# Supplementary material for: Necessity of harmonization of tissue transglutaminase IgA assays to align clinical decision making in coeliac disease
Source: publisher site journal article supplement (doi:10.1515/cclm-2021-1207), 2021-12-10
Supplement: Supplementary file 1 [file j_cclm-2021-1207_suppl.docx]

**Supplemental Data**

**Necessity of harmonization of tissue transglutaminase IgA assays to align clinical decision making in coeliac disease**

Louis Nevejan1,2, Pieter Dobbels3, Gary L Norman4, Anja Voreck5, Xavier Bossuyt2,6, Lieve Van Hoovels1,6,#

1Department of Laboratory Medicine, OLV Hospital, Aalst, Belgium

2Department of Laboratory Medicine, University Hospital Leuven, Leuven, Belgium

3Department of Gastroenterology, OLV Hospital, Aalst, Belgium

4Headquarters & Technology Center Autoimmunity, Werfen, San Diego, California, USA

5Thermo Fisher Scientific, Freiburg, Germany

6Department of Microbiology, Immunology and Transplantation, KU Leuven, Leuven, Belgium

*# Corresponding Author*

Lieve Van Hoovels, Department of Laboratory Medicine, OLV Hospital, Aalst, Belgium

E-mail: Lieve.Van.Hoovels@olvz-aalst.be

**Supplemental data Table 1.** **Demographic, histological, clinical and laboratory data of included CD patients at time of diagnosis (t = 0)**

|  | | | | |
| --- | --- | --- | --- | --- |
| Demographic data | | | | |
|  |  | Mean age, years (range) | | 40 (8-69) |
|  |  | Female, n (%) | | 11/13 (85%) |
|  |  | Adults, n (%) | | 11/13 (85%) |
|  |  | Risk factor | |  |
|  |  |  | Type I Diabetes mellitus, n (%) | 1/13 (8%) |
|  |  |  | First-degree CD relatives, n (%) | 1/13 (8%) |
|  |  |  | IgA deficiency, n (%) | 0/13 (0%) |
| Histological data | | | | |
|  |  | Marsh 1, n (%) | | 1/13 (8%) |
|  |  | Marsh 2, n (%) | | 0/13 (0%) |
|  |  | Marsh 3A, n (%) | | 4/13 (31%) |
|  |  | Marsh 3B, n (%) | | 4/13 (31%) |
|  |  | Marsh 3C, n (%) | | 3/13 (23%) |
|  |  | Not applicable, n (%) | | 1/13 (8%)+ |
| Clinical data++ | | | | |
|  | Classic intestinal symptoms, n of patients score ≥ 1 (mean score of positive patients) | | | |
|  |  | Persistent diarrhoea* | | 9/12 (mean score 5.7) |
|  |  | Constipation* | | 5/12 (mean score 3.6) |
|  | Non-classic extra-intestinal symptoms, n of patients score ≥ 1 (mean score of positive patients) | | | |
|  |  | Anorexia/refusal to eat* | | 3/12 (mean score 8.3) |
|  |  | Loss-of-weight* | | 1/12 (mean score 9.0) |
|  |  | Vomiting* | | 2/12 (mean score 2.5) |
|  |  | Irritability* | | 7/12 (mean score 7.3) |
|  |  | Skin problems* | | 4/12 (mean score 4.5) |
|  |  | Aphtous stomatitis* | | 3/12 (mean score 5.6) |
|  |  | Headache** | | 6/11 (mean score 4.0) |
|  |  | Tiredness** | | 11/11 (mean score 7.0) |
| Laboratory data+++ | | | | |
|  | Anaemia, n (%) | | | 1/12 (8%) |
|  | Elevated AST, n (%) | | | 1/13 (8%) |
|  | Elevated ALT, n (%) | | | 3/13 (23%) |
|  | Decreased iron, n (%) | | | 0/13 (0%) |
|  | Decreased ferritin, n (%) | | | 2/13 (15%) |
|  | Deficiency 25-OH-vitamin D, n (%) | | | 3/13 (23%) |
|  | tTG IgA | | |  |
|  |  | 0 – 20 CU (<ULN) | | 0/13 (0%) |
|  |  | 20 – 200 CU (<10xULN) | | 2/13 (15%) |
|  |  | >200 CU (>10xULN) | | 11/13 (85%) |

+ No duodenal biopsy performed since child (female, 8 years old), with tTG IgA level at diagnosis >10xULN (947 CU)

++ No rate of complaints on t = 0 available in *1/13 patients and **2/13 patients

+++ anaemia defined as haemoglobin <11 g/dL (<15 years old), <13 g/dL (men >15 years old), <12 g/dL (women >15 years old); elevated AST or ALT as >50 U/L (men), >35 U/L (women); decreased iron as <40 µg/dL (<18 years old), <33 µg/dL (>18 years old); decreased ferritin as <30 µg/L (men), <15 µg/L (women); deficiency 25-OH-vitamine D as ≤20 µg/L. Abbreviations: tTG, tissue transglutaminase; ULN, upper limit of normal
